# Supplementary material for: First-principles study of structural, elastic and electronic properties of naphyne and naphdiyne
Source: Royal Society of Chemistry journal article supplement (doi:10.1039/d0ra07214a), 2020-01-01
Supplement: d0ra07214a1.pdf [file d0ra07214a1.pdf]

## **Electronic Supplementary information**

**for**

### **First-principles study of structural, elastic and electronic properties of naphyne and naphdiyne**

Chuan Liu,<sup>\*a</sup> Zixiang Liu,<sup>a</sup> Xiangju Ye,<sup>a</sup> Ping Cheng,<sup>b</sup> and Yingjie Li<sup>c</sup>

*<sup>a</sup>College of Chemistry and Materials Engineering, Anhui Science and Technology University, Bengbu,  
233000, China*

*<sup>b</sup>College of Science, University of Shanghai for Science and Technology, Shanghai, 200093, China*

*<sup>c</sup>Anhui Key Lab of Coal Clean Conversion and Utilization, Anhui University of Technology, Maanshan,  
243032, China*

**Table S1** The energy values of  $E_{\text{sheet}}$ ,  $E_{\text{C, atom}}$ , and  $\mu_{\text{C, atom}}$  used for calculating cohesive energy and formation energy.

|             | $E_{\text{sheet}}(\text{NY})$ | $E_{\text{sheet}}(\text{NDY})$ | $E_{\text{C, atom}}$ | $\mu_{\text{C, atom}}$ |
|-------------|-------------------------------|--------------------------------|----------------------|------------------------|
| Energy (eV) | -310.32                       | -441.36                        | -1.37                | -9.22                  |

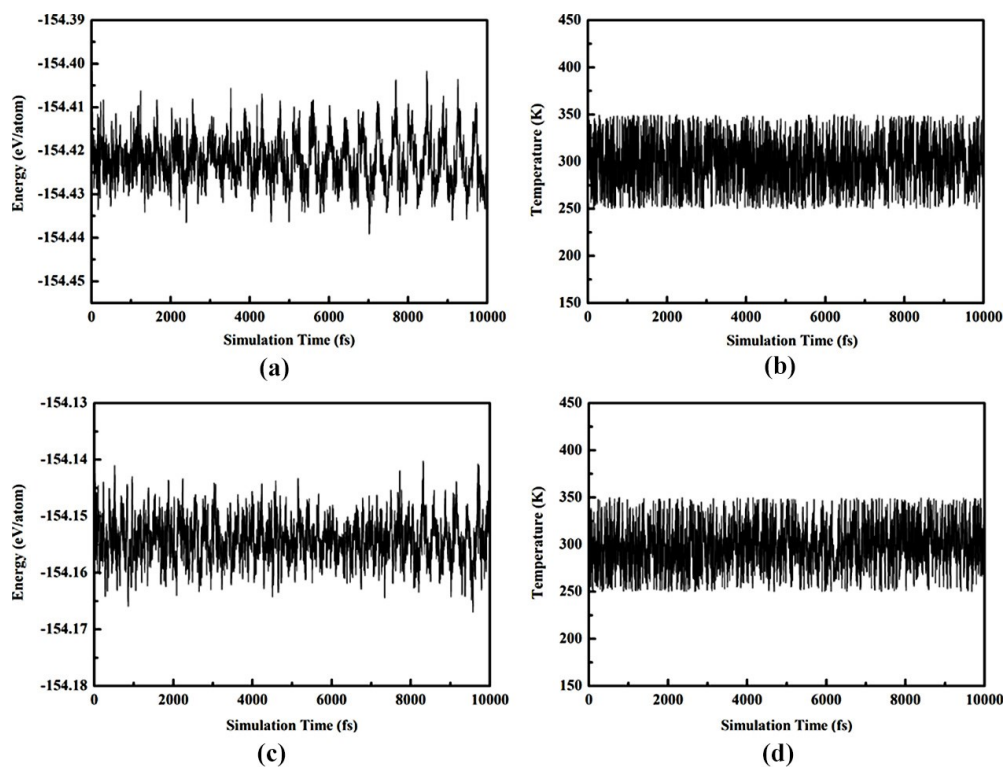

**Figure S1.** (a), (b), (c), and (d) show total energy and temperature fluctuations of naphyne and naphdiyne at 300 K, respectively.

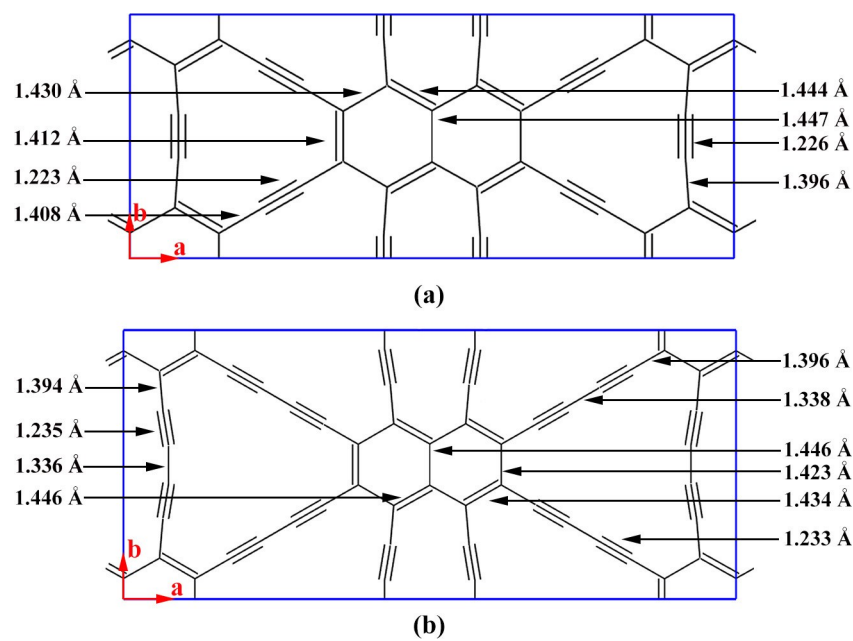

**Figure S2.** Equilibrium bond lengths of aromatic, single and triple bonds in (a) naphyne and (b) naphdiyne.

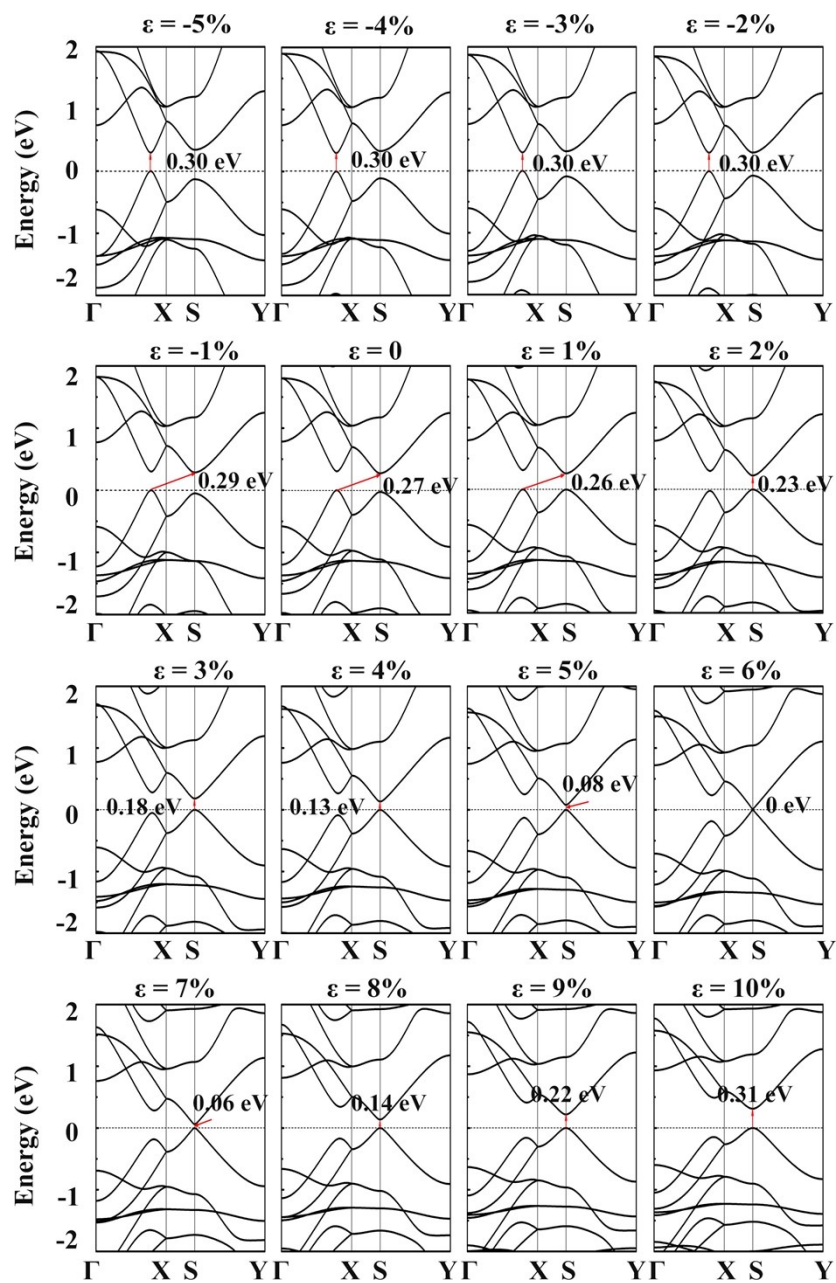

**Figure S3.** Electronic band structures of naphyne under the biaxial tensile strain from

1-10

%.

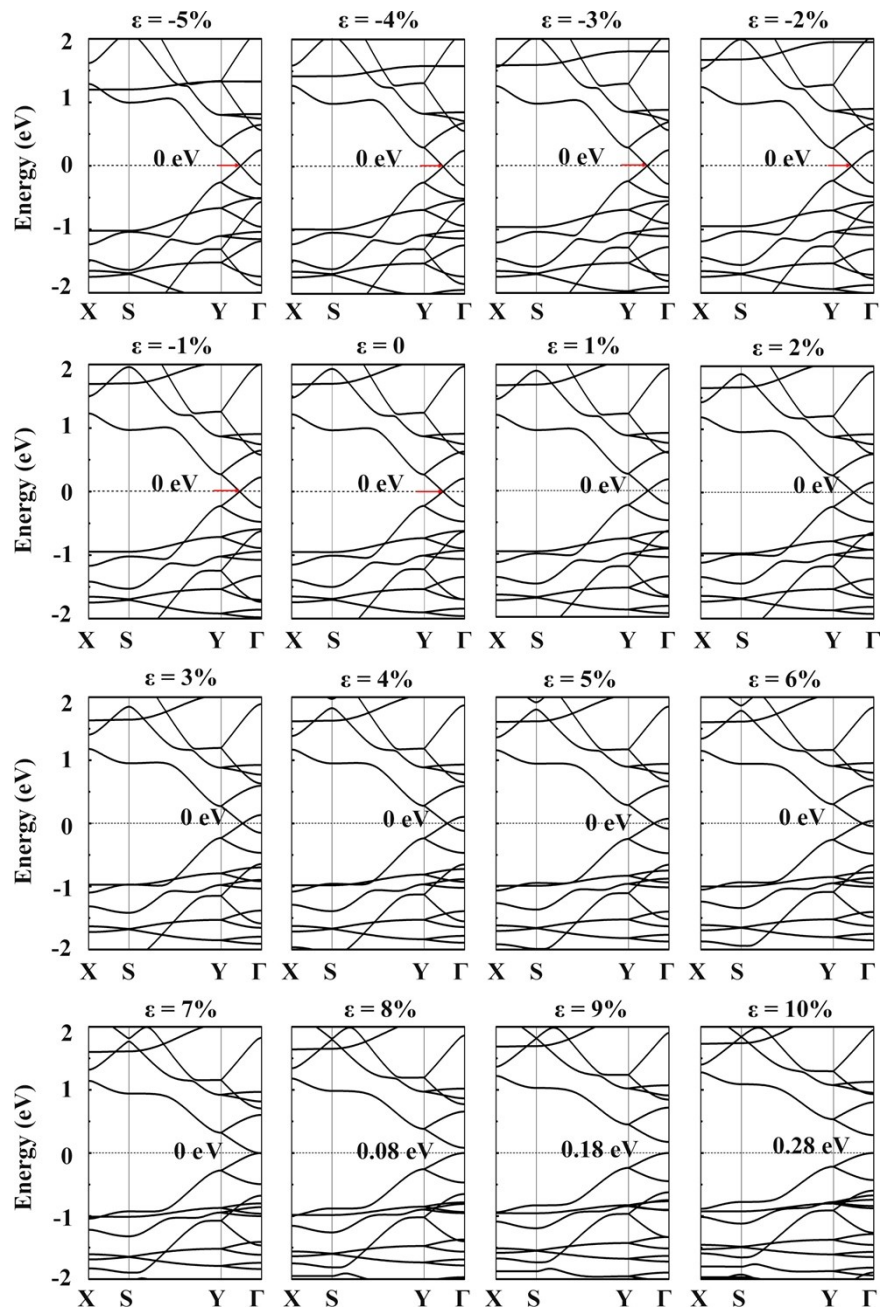

**Figure S4.** Electronic band structures of naphthalaldiyne under the biaxial tensile strain from 1-10 %.
